1 Prospective evaluation of beta-lactamase detection in penicillin susceptible  
2 *Staphylococcus aureus* by interpretation of the penicillin disc edge

3

4

5 Andrew Henderson<sup>a,b#\*</sup>, David Whiley<sup>b,c</sup>, Fleur Francis<sup>a</sup>, Cathy Engler<sup>a</sup>, Matthew  
6 Glover<sup>a</sup>, Joel Douglas<sup>d</sup>, Letitia Gore<sup>e\*</sup>, Patrick Harris<sup>b,c</sup>, David Paterson<sup>b</sup>, Graeme  
7 Nimmo<sup>c</sup>, Robert Norton<sup>a</sup>

8

9 Department of Microbiology, Pathology Queensland, Townsville Hospital,  
10 Australia<sup>a</sup>; University of Queensland Centre for Clinical Research, Brisbane,  
11 Australia<sup>b</sup>; Department of Microbiology, Pathology Queensland, Central  
12 Laboratory, Brisbane, Australia<sup>c</sup>; Department of Microbiology, Pathology  
13 Queensland, Princess Alexandra Hospital, Brisbane, Australia<sup>d</sup>; Department of  
14 Microbiology, Pathology Queensland, Gold Coast Hospital, Australia<sup>e</sup>

15

16 Running Head:  $\beta$ -Lactam Detection in Penicillin Susceptible *S. aureus*.

17

18 #Address correspondence to Andrew Henderson, [andrew@hendonet.com](mailto:andrew@hendonet.com)

19 \*Present address: Andrew Henderson, Infection Management Services, Princess  
20 Alexandra Hospital, Brisbane, Australia. Letitia Gore, Infectious Diseases  
21 Department, Mater Hospital Brisbane, Brisbane, Australia.

22

23 Abstract

24

25 Penicillin susceptible *Staphylococcus aureus* (PSSA) may occasionally be  
26 encountered as a cause of complicated *S. aureus* infection, such as endocarditis  
27 or bloodstream infections. Clinicians may choose to treat these patients with  
28 penicillin over a semi-synthetic penicillin derivative, such as flucloxacillin or  
29 oxacillin, due to a favourable Pk/Pd profile. In this study, we prospectively  
30 evaluated the penicillin disc (1-IU) method for detection of *blaZ*, with  
31 interpretation of the penicillin edge according to EUCAST recommendations.  
32 472 PSSA isolates were collected between September 2014 to December 2015  
33 from three clinical microbiology laboratories in Queensland, Australia. Initial  
34 antimicrobial susceptibility testing was performed by the Vitek 2 system. Real-  
35 time PCR for *blaZ* was performed following phenotypic testing with the 1-IU  
36 penicillin disc and the PCR used as the gold standard for detection of  
37 penicillinase. The prevalence of *blaZ* amongst the isolates was 7%. The  
38 sensitivity, specificity, positive predictive value and negative predictive value of  
39 the penicillin disc method was 97%, 95%, 61% and 100% when compared to  
40 *blaZ* PCR. In summary, the penicillin disc zone size and edge interpretation is a  
41 reliable method for detection of *blaZ* in *S. aureus* isolates that otherwise test  
42 susceptible to penicillin by Vitek 2 AST.

## 43 Introduction

44 Penicillin is commonly used to treat patients with complicated infections with  
45 invasive penicillin susceptible *Staphylococcus aureus* (PSSA) infections.(1) Key  
46 advantages of penicillin treatment include a lower MIC distribution compared with  
47 other beta-lactam agents active against *S. aureus*, as well as the ability to achieve  
48 higher free non-protein-bound plasma drug concentrations.(1) However, the  
49 recently updated American Heart Association guidelines on infective endocarditis  
50 do not recommend the use of penicillin for PSSA endocarditis.(2) This decision is  
51 primarily based on concerns raised over the ability of laboratory methods to  
52 accurately detect certain forms of penicillin resistance in *S. aureus*; specifically,  
53 current evidence indicates that screening methods for the *blaZ* penicillinase gene  
54 are insensitive.(2)

55

56 Two key mechanisms are responsible for resistance to penicillin in staphylococci;  
57 the *blaZ* gene which encodes for penicillinase, a serine beta-lactamase which  
58 hydrolyses the  $\beta$ -lactam ring resulting in the production of penicilloic acid, and the  
59 *mecA* gene which encodes for penicillin-binding protein (PBP) 2A.(3, 4) While the  
60 presence of *mecA* can readily and accurately be detected through the use of the  
61 cefoxitin disk diffusion test, there are well-recognized difficulties with detection of  
62 *blaZ*.(5) The nitrocefin hydrolysis test, previously a widely used phenotypic  
63 method for penicillinase detection amongst *S. aureus*, has been shown to produce  
64 false negative results.(6-10) Molecular methods (including PCR) may be more be  
65 accurate, but are typically too expensive and slow compared to the phenotypic

66 methods to be a suitable alternative for routine use. Molecular assays may also be  
67 impeded by the nucleotide variations in sequence targets associated with the  
68 different *blaZ* types.(10) At present, both CLSI and EUCAST recommend  
69 phenotypic testing via a penicillin disc.(11) By utilizing the penicillin disc method,  
70 isolates harbouring *blaZ* may still appear sensitive according to the zone size, but  
71 *blaZ* presence may be identified by closer inspection of the zone edge, and is  
72 indicated by the appearance of a straight edge or cliff. Although being the current  
73 recommended method, limited prospective data is available to confirm the validity  
74 of penicillin disc detection of *blaZ* in clinical microbiology laboratories. In fact,  
75 experiences at our laboratory suggest that scientists, particularly those  
76 infrequently performing the method, struggle to appropriately interpret the zone  
77 edges.

78

79 The study was designed to address two aims. The first aim was to use PCR to  
80 examine the prevalence of the *blaZ* beta-lactamase amongst PSSA isolates across  
81 3 microbiology laboratories in Queensland. The second aim was to prospectively  
82 evaluate the 1 IU penicillin disc test for detection of penicillinase in PSSA isolates  
83 compared to the nitrocefin test, using real-time PCR for *blaZ* as the gold standard.

84 Methods

85

86 Overview

87 This project was performed in a clinical microbiology laboratory in the city of

88 Townsville, located in the state of Queensland, Australia. From September 2014

89 to December 2015, isolates (total = 472) were prospectively collected for the

90 study from 3 laboratories (Townsville Hospital, Gold Coast Hospital, Princess

91 Alexandra Hospital).

92

93 For isolates collected in Townsville (n = 207), the interpretation and report of the

94 penicillin zone size and edge was performed by scientific staff as part of the

95 routine standard operating procedure; note that this zone test was the sole

96 method used for routine detection of *blaZ* when the Vitek 2 demonstrated

97 penicillin susceptibility. Isolates were then stored and later batch-tested as part

98 of the research study using the nitrocefin test and *blaZ* PCR and retested using

99 the penicillin disc test by the investigators (supervising scientist and microbiology

100 registrar). Isolates collected in the Gold Coast Hospital (n = 65) and Princess

101 Alexandra Hospital (n = 200) laboratories were stored and later transferred and

102 batch-tested as above (nitrocefin, *blaZ* PCR and penicillin disc tests) by the

103 investigators at the Townsville laboratory. It should be noted that all penicillin

104 disc tests were performed independently of and without knowledge of the

105 nitrocefin or *blaZ* PCR test results. Where isolates demonstrated discrepant

106 results between *blaZ* PCR and the penicillin disc test or nitrocefin results, the

107 isolate was repeated by all 3 tests and interpreted by two investigators blinded to  
108 each other's interpretation.

109

#### 110 *S. aureus* identification and susceptibility testing

111 Identification of *S. aureus* was performed at all three laboratories via a  
112 combination of latex agglutination for coagulase activity, presence of DNase  
113 (DNase test agar, Oxoid, Thermo Fisher Scientific), Vitek 2 (bioMerriex)  
114 identification and MALDI-TOF mass spectrometry (bioMerriex). All *S. aureus*  
115 isolates underwent antimicrobial susceptibility testing, performed with the Vitek 2  
116 automated broth microdilution antimicrobial susceptibility testing (AST) system,  
117 with susceptibility interpreted against EUCAST criteria.(11) Only isolates with  
118 penicillin MICs  $\leq 0.125$   $\mu\text{g/ml}$  (EUCAST penicillin breakpoint) were included in  
119 the study.

120

#### 121 *Penicillin disc test*

122 A 0.5 MacFarland suspension was made from a single colony of *S. aureus* for  
123 Kirby Bauer disc diffusion test on Mueller-Hinton agar (MHA, bioMerriex), with a  
124 30  $\mu\text{g}$  cefoxitin disc and 1  $\mu\text{g}$  penicillin disc incubated at 35 degrees Celsius in  
125 atmospheric oxygen for 24 hours. Zone sizes were measured and interpreted  
126 according to EUCAST criteria. Isolates with a zone  $< 26$  mm, or with a sharp  
127 zone edge were considered resistant.(11)

128

#### 129 *Nitrocefin test*

130 Phenotypic beta-lactamase activity was performed on all isolates using nitrocefin  
131 (SR12C; Oxoid) by the paper disc spot method, according to the manufacturer's  
132 instructions. A sweep of colonies were taken from the edge of the cefoxitin disc,  
133 which was incubated for 24 hours at 35 degrees Celsius, and applied to the  
134 nitrocefin impregnated region. A change in colour of the paper from yellow to red  
135 indicated a positive result and this was read after 15 minutes, 30 minutes and 1  
136 hour.

137

### 138 *blaZ* PCR

139 Bacterial DNA was extracted from pure colonies growing on Columbia horse  
140 blood agar by the boiling lysis method as follows. Two to three colonies of *S.*  
141 *aureus* were suspended in 0.5ml of sterile demineralised water and immersed in  
142 a water bath at 100 degrees Celsius for 10 minutes. After this, the suspension  
143 was centrifuged at 15000 × g for 30 seconds. 50 µl of supernatant was stored at -  
144 80 degrees Celsius, in preparation for performing nucleic acid amplification  
145 testing (NAAT).

146

147 Real-time PCR amplification of the *blaZ* gene was performed with the previously  
148 described primers and Taqman probe by Pereira, *et al.* (10), with some  
149 modifications. Briefly, the reaction mix contained 0.5 µM forward primer (5'-GCT  
150 TTA GAA CTT ATT GAG GCT TCA-3'), 0.5 µM reverse primer (5'-CCA CCG  
151 ATY TCK TTT ATA ATT T-3'), 0.2 µM Taqman probe (5'-FAM-AGT GAT AAT  
152 ACA GCA AAC AA-MGBNFQ-3', where FAM is 6-carboxyfluoroscein), 12.5 µl

153 QuantiTect Probe PCR buffer mix (Qiagen, Australia) and 5 µl of nucleic acid  
154 extract in a total volume of 25 µl per test. The primers and probe were sourced  
155 from Integrated DNA Technologies. Amplification was performed using  
156 RotorgeneQ real-time thermocyclers (Qiagen, Australia), with reactions run under  
157 the following conditions: 95 °C for 10 minutes, followed by 45 cycles of 95 °C for  
158 15 seconds and 60 °C for 60 seconds. Fluorescent probe signals were read  
159 during the 60 second extension step of the cycling program.

160

### 161 Statistical analysis

162 All statistical analysis was performed using R (R Project for Statistical  
163 Computing, <http://www.r-project.org/>). Graphs were created though the ggplot2  
164 package with the exception of the receiver operator curve for zone size and *blaZ*  
165 detection, which was created through the pROC package.(12) Cohen's Kappa  
166 score was used to determine the agreement between scientific staff and  
167 investigators for interpretation of the penicillin zone edge for the isolates  
168 collected in Townsville. McNemar's test was performed to compare sensitivity  
169 and specificity, whereas weighted generalized scores were performed to  
170 compare positive and negative predictive values for paired isolates (13, 14). A p-  
171 value <0.05 was considered statistically significant.



172 Results

173

174 The overall prevalence rate of *blaZ* amongst the combined 472 PSSA isolates  
175 was 7.3% (n = 34, 95% confidence interval 5.3% - 10.1%) according to the *blaZ*  
176 PCR results. This result was similar amongst the 207 isolates from the  
177 Townsville Hospital laboratory (prevalence = 6.8%, 95% CI 4.0 - 11.0%), the 65  
178 isolates from the Gold Coast Hospital laboratory (10.8%, 95% CI 0.8% - 13.2%)  
179 and the 200 isolates from the PA Hospital laboratory (6.5%, 95% CI 3.8% -  
180 10.6%).

181

182 Table 1 demonstrates the sensitivity, specificity and predictive values calculated  
183 for the penicillin disc test and nitrocefin test for *blaZ* detection (using the *blaz* PCR  
184 as the gold standard). In comparison to the penicillin disc test, nitrocefin performed  
185 poorly at detecting *blaZ* amongst PSSA isolates. The sensitivity of nitrocefin (15%,  
186 95% CI 5 – 31%) was lower than the penicillin disc test (97%, 95% CI 85 – 100%)  
187 for detection of *blaZ*, with the difference in sensitivity between the penicillin disc  
188 test and nitrocefin found to be statistically significant (p < 0.01). Despite the low  
189 prevalence rate of *blaZ* amongst the isolates, a statistically significant difference  
190 between the negative predictive value (NPV) of nitrocefin and the penicillin disc  
191 test was detected (94% versus 100%; p <0.01)

192

193 Figure 1 demonstrates a histogram of penicillin zone size for the isolates based  
194 upon detection or absence of *blaZ*. A receiver operator curve (Supplementary

195 Figure 1) was derived from the zone sizes to determine sensitivity and specificity  
196 of zone size for detection of *blaZ* and is demonstrated in Supplementary Table 2.  
197 For isolates with a Vitek 2 MIC of  $\leq 0.03$   $\mu\text{g/ml}$ , *blaZ* was detected in 4/83  
198 isolates, compared to 8/275 and 22/114 with MICs of 0.06  $\mu\text{g/ml}$  and 0.12  $\mu\text{g/ml}$   
199 respectively.

200

201 Two isolates were found to have penicillin zone sizes less than 26mm (EUCAST  
202 breakpoint) yet *blaZ* was not detected by PCR. Both isolates demonstrated sub-  
203 populations of growth within an outer zone of inhibition to the penicillin disc that  
204 measured greater than 26 mm. The edge of the outer zone appeared fuzzy,  
205 indicating absence of beta-lactamase. In addition, both isolates (inner and outer  
206 populations) tested negative for penicillinase activity by nitrocefin. The sub-  
207 population colonies growing inside the outer zone were confirmed to be *S. aureus*  
208 when identification was repeated. Vitek 2 AST was then performed on the sub-  
209 population colonies growing within the zone of inhibition with results now  
210 demonstrating penicillin MICs  $\geq 0.5$   $\mu\text{g/ml}$ , yet both isolates were now found to  
211 have oxacillin MICs  $\geq 2$   $\mu\text{g/ml}$  and were cefoxitin screen positive. The sub-  
212 population colonies demonstrated heavy growth on MRSA chromogenic agar  
213 (Biomérieux). To confirm the presence of *mecA*, Xpert MRSA/SA assay  
214 (Cepheid, Sunnyvale, CA) was performed on both the outer zone and inner zone  
215 populations. The inner zone population was confirmed as MRSA with *mecA*  
216 detected, however the outer population did not have *mecA* detected.

217

218 Overall, 25 isolates produced initial discordant phenotypic results when compared  
219 to *blaZ* PCR, with all discordant results resolved upon repeat testing by the  
220 investigators (Supplementary Table 2. 24 *blaZ* negative isolates were incorrectly  
221 reported as resistant (13 by scientists and 11 by investigators) and 1 *blaZ* positive  
222 isolate was incorrectly reported by a scientist as susceptible to penicillin when  
223 interpreting the penicillin disc test. Agreement by Cohen's Kappa score between  
224 scientists and investigators for Townsville isolates was 0.58 (moderate  
225 agreement).

## 226 Discussion

227

228 In this study, we investigated beta-lactamase detection amongst PSSA isolates  
229 in a routine clinical microbiology laboratory following the recent introduction of the  
230 penicillin disc test to replace the nitrocefin test. The results of our study, along  
231 with other recently reported studies, confirm that the penicillin disc test (using  
232 EUCAST methodology) is a reliable predictor of phenotypic activity of *blaZ*.(8-10)  
233 Notably, only 1 isolate that was positive for *blaZ* by PCR was not detected by the  
234 penicillin disc test. This isolate was tested by scientists as part of routine  
235 practice and was incorrectly reported as susceptible to penicillin. The isolate was  
236 subsequently confirmed as penicillin resistant by the investigators when the test  
237 was repeated and the discrepancy was considered to be caused by human error,  
238 rather than a problem with the penicillin disc test. Consistent with previous  
239 studies, we also found the nitrocefin test to be highly insensitive and re-enforces  
240 the decision of our local laboratories to move away from the nitrocefin test as per  
241 the updated EUCAST recommendations.(6, 8, 9)

242

243 Overall the prevalence rate of *blaZ* detected in PSSA from the three laboratories  
244 was 7%. This rate is lower than from recently reported SAB data in 2013, in the  
245 Australian setting, where 332 (20.4%) isolates initially tested susceptible to  
246 penicillin from 1342 episodes of MSSA bacteraemias and beta-lactamase was  
247 detected in 69 (20.8%) of the PSSA isolates.(15) These rates support the  
248 recommendation made by EUCAST to screen for *blaZ* amongst PSSA in our

249 region prior to reporting isolates as susceptible to penicillin.(11) Although there  
250 are theoretical advantages to using penicillin over other agents for PSSA  
251 infections, the use of penicillin for this indication needs to be considered against  
252 the capacity of the laboratory to detect *blaZ*. Importantly, the NPV of the  
253 penicillin disc test was 99% when performed by the routine scientists and 100%  
254 by the investigators. These high NPVs suggest that if clinicians were to treat  
255 patients with penicillin on the basis of a negative penicillin disc test result then  
256 the use of use penicillin would be appropriate in at least 99% of cases. In  
257 contrast, the significantly lower NPV of the nitrocefin test (94%,  $p < 0.01$ ) would  
258 result in approximately 6% of patients (infected with *blaZ*-harbouring strains)  
259 inappropriately receiving penicillin treatment. Although the positive predictive  
260 value (PPV) of the disc test was lower than the nitrocefin method (76% vs 100%),  
261 this issue (reporting of false resistance) was not considered a major limitation of  
262 the disc test as it would only limit treatment options, rather than leading to  
263 incorrect treatment. Also, clinicians may otherwise choose to use flucloxacillin  
264 over penicillin regardless of the laboratory reporting penicillin as susceptible.(16)  
265 As such, it is our opinion that the potential benefit of the PPV of nitrocefin should  
266 not be relied upon when laboratories make a decision in regards to the choice of  
267 test for *blaZ* detection.

268

269

270 An unusual finding in this study was the identification of 2 subpopulations of  
271 MRSA that were *blaZ* negative. Heterogenous expression of methicillin

272 resistance was able to be identified by induction of sub-populations expressing  
273 resistance through prolonged beta-lactam exposure using penicillin discs. A  
274 likely explanation for this is the presence of two distinct *S. aureus* populations  
275 (hetero-resistance), one carrying the *mecA* gene and one without, but with both  
276 populations negative for *blaZ*. It is possible that *mecA* expression was altered in  
277 the absence of *blaZ* given that *mecA* induction occurs at a much slower rate than  
278 that of *blaZ* induction, with a recent study demonstrating that expression of *mecA*  
279 relies upon an intact *blaZ* system.(17) Optimal expression of methicillin  
280 resistance, occurring when both regulatory systems are present, is due to the  
281 formation of Blal:Mecl heterodimers that weakly bind to the *mecA* operon and are  
282 then more susceptible to BlaR1 preteolysis and inactivation, thereby resulting in  
283 transcription of *mecA*.(17)

284

285 Although our study demonstrated a reliable method for phenotypic detection of  
286 beta-lactamase in PSSA isolates there are some limitations. Firstly, we cannot  
287 exclude that *blaZ* variants may not have been detected by the primers and probe  
288 used in this study. Similarly, we did not perform any sequencing of the real-time  
289 PCR products to confirm the specificity of the assay. In addition, many laboratories  
290 only perform beta-lactamase testing in PSSA on isolates from blood culture, or  
291 sterile sites, where a long phase of intravenous and/or oral antibiotics may be  
292 required. Therefore, for laboratories that perform the test on an ad-hoc basis,  
293 accurately discerning the edge of the penicillin disc may prove more challenging.  
294 This may explain why the specificity result was shown to be lower for scientists,

295 than for the investigators (93% versus 97%). This point is reinforced in the  
296 EUCAST guidelines for clinical breakpoints.(11) A clear instruction is given to err  
297 on the side of caution and to report isolates as resistant if the result of the test is  
298 not clear to the observer.(11)

299

300 In summary, for clinicians to confidently use penicillin for the treatment of PSSA,  
301 we recommend laboratories consider the penicillin disc test over nitrocefin.  
302 Notwithstanding this, laboratories performing the penicillin disc test on an ad-hoc  
303 basis run the risk of reduced sensitivity and specificity given interpretation of the  
304 disc edge may be dependent on the experience of the scientist.

305

306 Acknowledgements

307 Funding for this study was provided for by a Study Education and Research  
308 Committee grant from Pathology Queensland. The authors would like to thank the  
309 3 laboratories from the Gold Coast Hospital, Townsville Hospital and Princess  
310 Alexandra Hospital or providing the isolates for the study.



## 311 References

- 312 1. YA Q, Moreillon P. 2015. *Staphylococcus aureus*. In JE B, R D, MJ B (ed),  
313 Mandell , Douglas and Bennett's principles and practice of infectious diseases, 8th  
314 ed. Saunders, Philadelphia, PA.
- 315 2. Baddour LM, Wilson WR, Bayer AS, Fowler VG, Jr., Tleyjeh IM, Rybak MJ,  
316 Barsic B, Lockhart PB, Gewitz MH, Levison ME, Bolger AF, Steckelberg JM,  
317 Baltimore RS, Fink AM, O'Gara P, Taubert KA, American Heart Association  
318 Committee on Rheumatic Fever E, Kawasaki Disease of the Council on  
319 Cardiovascular Disease in the Young CoCCCoCS, Anesthesia, Stroke C. 2015.  
320 Infective Endocarditis in Adults: Diagnosis, Antimicrobial Therapy, and  
321 Management of Complications: A Scientific Statement for Healthcare  
322 Professionals From the American Heart Association. *Circulation* 132:1435-1486.
- 323 3. Barber M. 1947. Staphylococcal infection due to penicillin-resistant strains.  
324 *Br Med J* 2:863-865.
- 325 4. Fuda CC, Fisher JF, Mobashery S. 2005. Beta-lactam resistance in  
326 *Staphylococcus aureus*: the adaptive resistance of a plastic genome. *Cell Mol Life*  
327 *Sci* 62:2617-2633.
- 328 5. Fernandes CJ, Fernandes LA, Collignon P, Australian Group on  
329 Antimicrobial R. 2005. Cefoxitin resistance as a surrogate marker for the detection  
330 of methicillin-resistant *Staphylococcus aureus*. *J Antimicrob Chemother* 55:506-  
331 510.
- 332 6. El Feghaly RE, Stamm JE, Fritz SA, Burnham CA. 2012. Presence of the  
333 bla(Z) beta-lactamase gene in isolates of *Staphylococcus aureus* that appear

- 334 penicillin susceptible by conventional phenotypic methods. *Diagn Microbiol Infect*  
335 *Dis* 74:388-393.
- 336 7. Gill VJ, Manning CB, Ingalls CM. 1981. Correlation of penicillin minimum  
337 inhibitory concentrations and penicillin zone edge appearance with staphylococcal  
338 beta-lactamase production. *J Clin Microbiol* 14:437-440.
- 339 8. Kaase M, Lenga S, Friedrich S, Szabados F, Sakinc T, Kleine B, Gatermann  
340 SG. 2008. Comparison of phenotypic methods for penicillinase detection in  
341 *Staphylococcus aureus*. *Clin Microbiol Infect* 14:614-616.
- 342 9. Papanicolas LE, Bell JM, Bastian I. 2014. Performance of phenotypic tests  
343 for detection of penicillinase in *Staphylococcus aureus* isolates from Australia. *J*  
344 *Clin Microbiol* 52:1136-1138.
- 345 10. Pereira LA, Harnett GB, Hodge MM, Cattell JA, Speers DJ. 2014. Real-time  
346 PCR assay for detection of *blaZ* genes in *Staphylococcus aureus* clinical isolates.  
347 *J Clin Microbiol* 52:1259-1261.
- 348 11. EUCAST. 2015. The European Committee on Antimicrobial Susceptibility  
349 Testing. Breakpoint tables for interpretation of MICs and zone diameters. Version  
350 8.1, valid from 2018-05-15. <http://www.eucast.org>. Accessed 15/06/2018.
- 351 12. H W. 2009. *ggplot2: Elegant Graphics for Data Analysis*. Springer-Verlag,  
352 New York.
- 353 13. Kosinski AS. 2013. A weighted generalized score statistic for comparison  
354 of predictive values of diagnostic tests. *Stat Med* 32:964-977.

- 355 14. Trajman A, Luiz RR. 2008. McNemar chi2 test revisited: comparing  
356 sensitivity and specificity of diagnostic examinations. Scand J Clin Lab Invest  
357 68:77-80.
- 358 15. Coombs GW, Nimmo GR, Daly DA, Le TT, Pearson JC, Tan HL, Robinson  
359 JO, Collignon PJ, McLaws ML, Turnidge JD, Australian Group on Antimicrobial R.  
360 2014. Australian Staphylococcus aureus Sepsis Outcome Programme annual  
361 report, 2013. Commun Dis Intell Q Rep 38:E309-319.
- 362 16. Chabot MR, Stefan MS, Friderici J, Schimmel J, Larioza J. 2015.  
363 Reappearance and treatment of penicillin-susceptible Staphylococcus aureus in a  
364 tertiary medical centre. J Antimicrob Chemother 70:3353-3356.
- 365 17. Arede P, Ministro J, Oliveira DC. 2013. Redefining the role of the beta-  
366 lactamase locus in methicillin-resistant Staphylococcus aureus: beta-lactamase  
367 regulators disrupt the Mecl-mediated strong repression on mecA and optimize the  
368 phenotypic expression of resistance in strains with constitutive mecA expression.  
369 Antimicrob Agents Chemother 57:3037-3045.

370 Table 1. Sensitivity, specificity, negative and positive predictive value of the penicillin disc test in comparison to nitrocefin.

|                          | Penicillin 1-IU Disc Test              |                             |         |                                                 | Nitrocefin <sup>α</sup><br>(n = 472)<br>% (95% CI) | P Value <sup>β</sup> |
|--------------------------|----------------------------------------|-----------------------------|---------|-------------------------------------------------|----------------------------------------------------|----------------------|
|                          | Townsville Hospital Isolates (n = 207) |                             |         | Overall <sup>α</sup><br>(n = 472)<br>% (95% CI) |                                                    |                      |
|                          | Scientists<br>% (95% CI)               | Investigators<br>% (95% CI) | P Value |                                                 |                                                    |                      |
| Sensitivity <sup>a</sup> | 93 (79 – 100)                          | 100 (100 – 100)             | 1       | 100 (100 – 100)                                 | 15 (5 – 31)                                        | <0.01                |
| Specificity <sup>b</sup> | 93 (90 – 97)                           | 98 (97 – 100)               | 0.01    | 97 (96 – 99)                                    | 100 (99 – 100)                                     | <0.01                |
| PPV <sup>c</sup>         | 50 (31 – 69)                           | 82 (64 – 100)               | <0.01   | 76 (63 – 88)                                    | 100 (36 – 100)                                     | 0.07                 |
| NPV <sup>d</sup>         | 99 (98 – 100)                          | 100 (100 – 100)             | 0.3     | 100 (100 – 100)                                 | 94 (91 – 96)                                       | <0.01                |

371

372 a Sensitivity = True positives/(False negatives + True positives)

373 b Specificity = True negatives/(False positives + True negatives)

374 c Positive predictive value = True positives/(False positives + True positives)

375 d Negative predictive values = True negative/(False negatives + True negatives)

- 376  $\alpha$  Test performed by investigators; includes Townsville laboratory isolates, Gold Coast laboratory isolates and Princess  
377 Alexandra Hospital isolates.
- 378  $\beta$  Comparison between penicillin disc and nitrocefin

379 Figure 1 Histogram of Penicillin Zone Size According to Presence of *blaZ*.

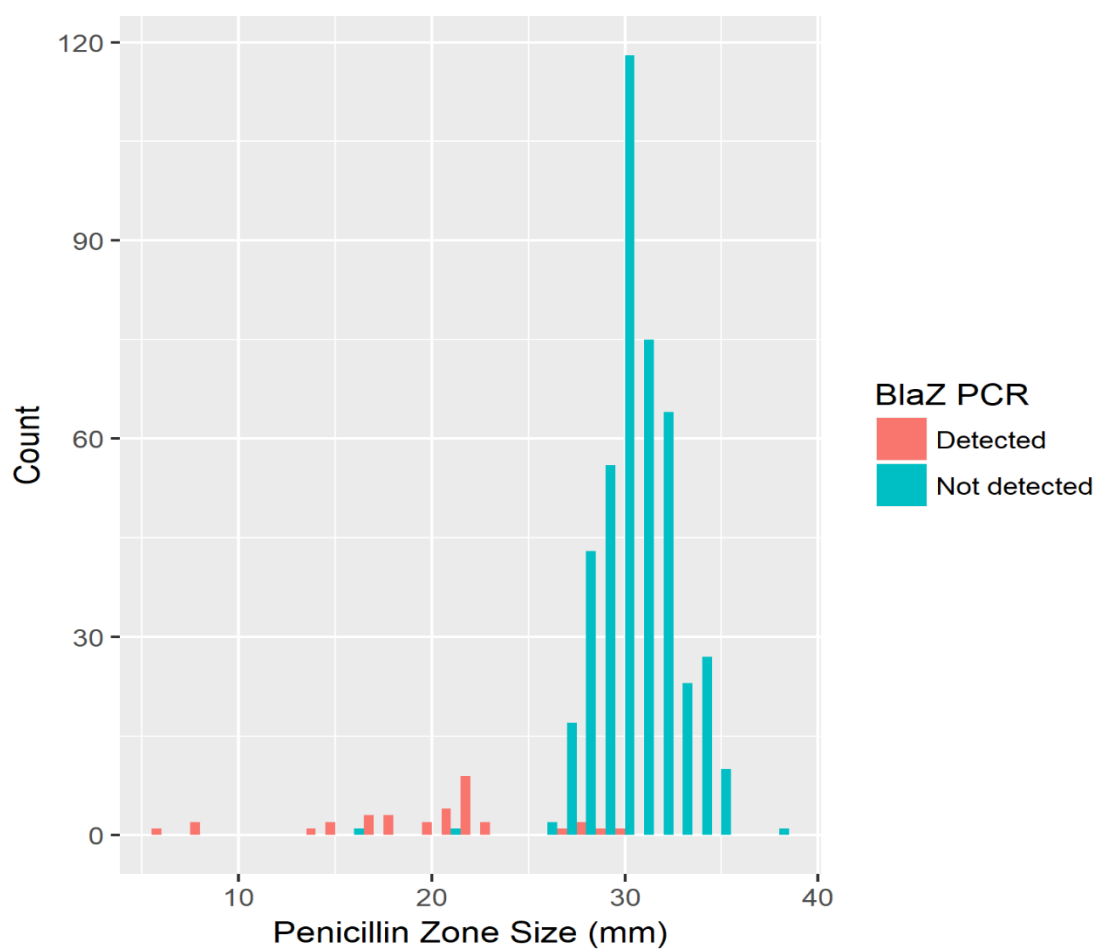

380
